# Supplementary material
Source: Elsevier journal article supplement (https://www.sciencedirect.com/science/article/pii/S030089321730218X)

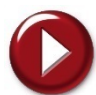

## Material suplementario

# Evaluación de la validez de las funciones SCORE de bajo riesgo y calibrada para población española en las cohortes FRESCO

## MATERIAL SUPLEMENTARIO

### Tabla 1 del material suplementario

Características de cada estudio componente de la cohorte FRESCO

| Estudio componente   | Comunidades autónomas | Fuente de población | Año de reclutamiento | N.º de participantes (35-79 años) | Edad al reclutamiento (años) media $\pm$ DE | Mujeres, n (%) | Años de seguimiento, mediana (RIC) |
|----------------------|-----------------------|---------------------|----------------------|-----------------------------------|---------------------------------------------|----------------|------------------------------------|
| CORSAIB <sup>1</sup> | Islas Baleares        | Población general   | 1998                 | 1.537                             | 53 $\pm$ 11                                 | 838 (54,5)     | 10 (10-10)                         |
| DRECA-2 <sup>2</sup> | Andalucía             | Población general   | 1991                 | 558                               | 46 $\pm$ 7                                  | 299 (53,6)     | 10 (10-10)                         |
| DRECE <sup>3</sup>   | Todas                 | Población general   | 1991                 | 1.775                             | 47 $\pm$ 7                                  | 922 (51,9)     | 10 (10-10)                         |
| EMMA <sup>4</sup>    | Cataluña              | Usuarios del SNS    | 1998-2002            | 34.861                            | 58 $\pm$ 12                                 | 18.756 (53,8)  | 9,4 (8,2-10)                       |
| MURCIA <sup>5</sup>  | Región de Murcia      | Población general   | 1991-1993            | 1.797                             | 48 $\pm$ 9                                  | 934 (52,0)     | 10 (10-10)                         |
| NAVARRA <sup>6</sup> | Comunidad Foral de    | Usuarios del SNS    | 1993                 | 930                               | 49 $\pm$ 9                                  | 478 (51,4)     | 10 (10-10)                         |

| Navarra                   |                       |                   |             |        |         |               |             |
|---------------------------|-----------------------|-------------------|-------------|--------|---------|---------------|-------------|
| REGICOR <sup>7</sup>      | Cataluña              | Población general | 1995 & 2000 | 3.731  | 54 ± 11 | 1.934 (51,8)  | 10 (9,1-10) |
| REUS <sup>8</sup>         | Cataluña              | Usuarios del SNS  | 2004        | 1.078  | 56 ± 11 | 609 (56,5)    | 10 (10-10)  |
| RIVANA <sup>9</sup>       | Navarra               | Usuarios del SNS  | 2004        | 3.806  | 53 ± 12 | 2.122 (55,8)  | 10 (10-10)  |
| TALAVERA <sup>10</sup>    | Castilla-La<br>Mancha | Usuarios del SNS  | 1994-1996   | 997    | 57 ± 11 | 526 (52,8)    | 10 (10-10)  |
| ZACARIS <sup>11</sup>     | Aragón                | Usuarios del SNS  | 1994        | 3.372  | 56 ± 11 | 1.935 (57,4)  | 10 (10-10)  |
| ZONA FRANCA <sup>12</sup> | Cataluña              | Usuarios del SNS  | 1998-1999   | 850    | 56 ± 11 | 495 (58,2)    | 10 (10-10)  |
| Todos                     |                       |                   |             | 55.292 | 56 ± 12 | 29.848 (54,0) | 10 (8,8-10) |

DE: desviación estándar; RIC: rango intercuartílico; SNS: Sistema Nacional de Salud.

## Tabla 2 del material suplementario

Características basales de los participantes, resultados de la estimación del riesgo cardiovascular con la función SCORE-OBR (riesgo multiplicado por 2 y 4, en varones y mujeres con diabetes, respectivamente) y variables de resultado estratificadas por sexo

|                                          | Varones (n = 14.661) | Mujeres (n= 16.258) |
|------------------------------------------|----------------------|---------------------|
| <i>Edad (años)</i>                       | 52 ± 7               | 52 ± 7              |
| <i>Fumador</i>                           | 4.891 (33,7)         | 2.284 (14,2)        |
| <i>Colesterol total (mg/dl)</i>          | 220 ± 36             | 221 ± 37            |
| <i>Diabetes mellitus</i>                 | 2.393 (16,4)         | 1.818 (11,2)        |
| <i>Presión arterial sistólica (mmHg)</i> | 134 ± 16             | 129 ± 16            |
| <i>SCORE-OBR ×2/×4 (%)</i>               | 2,99 ± 3,26          | 1,14 ± 1,98         |
| <i>SCORE-OBR ×2/×4</i>                   |                      |                     |
| < 1%                                     | 4.136 (28,7)         | 10.826 (67,8)       |
| ≥ 1-5%                                   | 7.843 (54,4)         | 4.478 (28,0)        |
| ≥ 5%                                     | 2.447 (17,0)         | 668 (4,2)           |
| <i>Mortalidad total a 10 años*</i>       | 545 (3,7)            | 275 (1,7)           |
| <i>Causa de fallecimiento*</i>           |                      |                     |
| Cardiovascular                           | 103 (0,7)            | 52 (0,3)            |
| No cardiovascular                        | 439 (3,0)            | 218 (1,3)           |
| Indeterminada                            | 3 (< 0,1)            | 5 (< 0,1)           |

DE: desviación estándar; SCORE-OBR: *Systematic COronary Risk Evaluation* original de bajo riesgo.

Salvo otra indicación, los datos expresan n (%) o media ± desviación estándar.

\*Estimada por el método de Kaplan-Meier.

**BIBLIOGRAFÍA**

1. Rigo Carratalá F, Frontera Juan G, Llobera Cànaves J, Rodríguez Ruiz T, Borrás Bosch I, Fuentespina Vidal E. Prevalence of Cardiovascular Risk Factors in the Balearic Islands (CORSAIB Study). *Rev Esp Cardiol.* 2005;58:1411-1419.
2. Santos JM, Urbano V, Mayoral E, et al. Prevalence of the metabolic syndrome in Andalusian population according to the definitions of ATPIII and International Diabetes Federation. *Obes Metab.* 2009;5 Suppl 1:38.
3. Gómez de la Cámara A, Rubio Herrera MA, Gutiérrez Fuentes JA, et al. 1991-2004 follow-up of a Spanish general population cohort. Mortality and raising risk factors in the DRECE III Study (Diet and Risk of Cardiovascular Diseases in Spain). *Rev Esp Salud Publica.* 2008;82:415-423.
4. Ramos R, Balló E, Marrugat J, et al. Validity for Use in Research on Vascular Diseases of the SIDIAP (Information System for the Development of Research in Primary Care): the EMMA Study. *Rev Esp Cardiol.* 2012;65:29-37.
5. Huerta JM, Tormo MJ, Gavrilá D, Navarro C. Cardiovascular risk estimated after 13 years of follow-up in a low-incidence Mediterranean region with high-prevalence of cardiovascular risk factors. *BMC Public Health.* 2010;10:640.
6. Guembe MJ. Prevalencia de factores de riesgo vascular en Navarra 1993. *Bol Salud Public Nav.* 1994;7:2-8.
7. Grau M, Subirana I, Elosua R, et al. Trends in cardiovascular risk factor prevalence (1995-2000-2005) in northeastern Spain. *Eur J Cardiovasc Prev Rehabil.* 2007;14:653-659.
8. Cabré JJ, Martín F, Costa B, et al. Metabolic syndrome as a cardiovascular disease risk factor: patients evaluated in primary care. *BMC Public Health.* 2008;8:251.

9. Viñes JJ, Díez J, Guembe MJ, et al. Study of vascular risk in Navarre: objectives and design. Prevalence of metabolic syndrome and of vascular risk factors. *An Sist Sanit Navar*. 2007;30:113-124.
10. Segura Fragoso A, Rius Mery G. Factores de riesgo cardiovascular en una población rural de Castilla-La Mancha. *Rev Esp Cardiol*. 1999;52:577-588.
11. Marín A, Medrano MJ, González J, et al. Risk of ischaemic heart disease and acute myocardial infarction in a Spanish population: observational prospective study in a primary-care setting. *BMC Public Health*. 2006;6:38.
12. Baena Díez JM, Del Val García JL, Tomàs Pelegrina J, et al. The Epidemiology of Cardiovascular Disease in Primary Care. The Zona Franca Cohort Study in Barcelona, Spain. *Rev Esp Cardiol*. 2010;63:1261-1269.

**PIES DE FIGURAS**

**Figura 1 del material suplementario.** Área bajo la curva (ABC) de la función SCORE original de bajo riesgo. En pacientes diabéticos el riesgo se ha multiplicado por 2 y 4 en varones y mujeres, respectivamente.

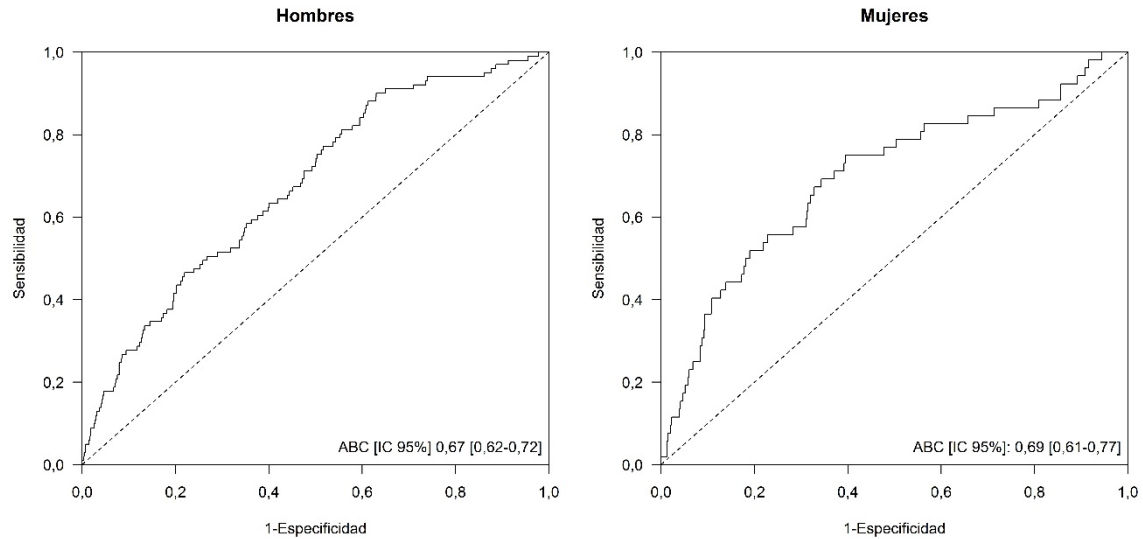

**Figura 2 del material suplementario.** Calibración en sextiles de riesgo de muerte CV de la función SCORE original de bajo riesgo. Las líneas en la parte superior de cada barra indican el intervalo de confianza del 95%. En pacientes diabéticos el riesgo se ha multiplicado por 2 y 4 en varones y mujeres, respectivamente. CV: cardiovascular.

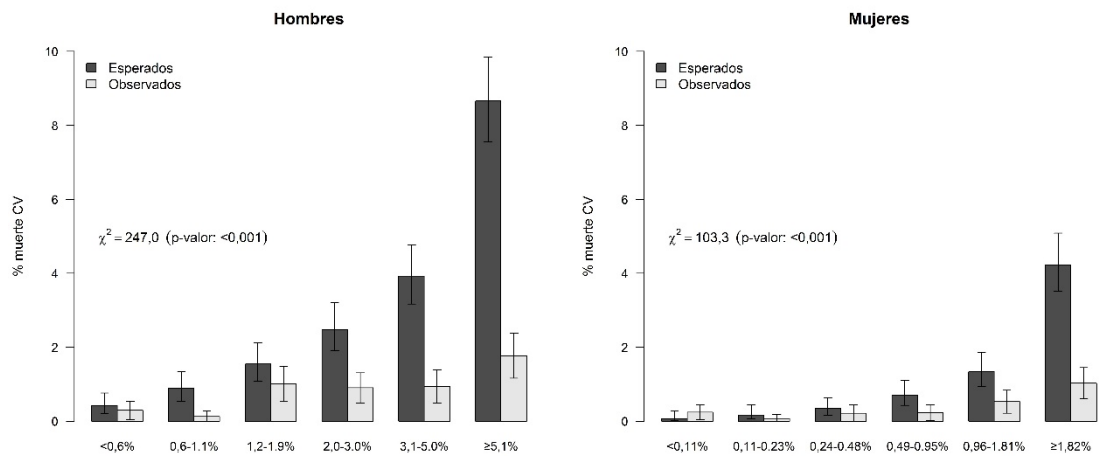

**Figura 3 del material suplementario.** Proporción de población en diferentes grupos de riesgo de muerte cardiovascular según SCORE-OBR, SCORE-C y SCORE-OBR-cHDL (barras) y proporción de casos sobre el total que provienen de cada grupo (líneas y puntos). En pacientes diabéticos el riesgo se ha multiplicado por 2 y 4 en varones y mujeres, respectivamente. SCORE-C: *Systematic COronary Risk Evaluation* Calibrada; SCORE-OBR: *Systematic COronary Risk Evaluation Original* de Bajo Riesgo; SCORE-OBR-cHDL: *Systematic COronary Risk Evaluation Original* de Bajo Riesgo con colesterol HDL.

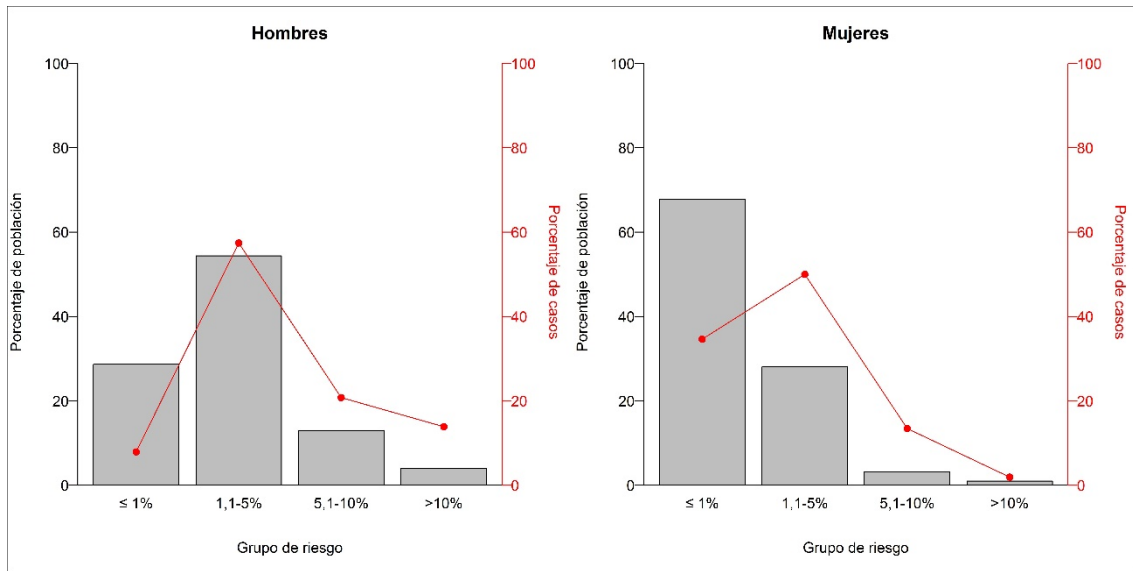

Supplement: mmc1 [file mmc1.pdf]
